# Supplementary material for: Gold(i) complexes of bisphosphines with bis(azol-1-yl)methane backbone: structure of a rare dinuclear gold(i) complex [(Au2Cl){CH2(1,2-C3H2N2PPh2)2}3Cl]
Source: Royal Society of Chemistry journal article supplement (doi:10.1039/c5dt03161c), 2015-01-01
Supplement: c5dt03161c1.pdf [file c5dt03161c1.pdf]

## Supporting Information

### Gold(I) complexes of bisphosphines with bis(azol-1yl)methane backbone: Structure of a rare dinuclear gold(I) complex [(Au<sub>2</sub>Cl){CH<sub>2</sub>(1,2- C<sub>3</sub>H<sub>2</sub>N<sub>2</sub>PPh<sub>2</sub>)<sub>3</sub>}]Cl

Sajad A. Bhat,<sup>a</sup> Joel T. Mague<sup>b</sup> and Maravanji S. Balakrishna<sup>a\*</sup>

<sup>a</sup>*Phosphorus Laboratory, Department of Chemistry, Indian Institute of Technology Bombay, Powai, Mumbai, 400076, India*

<sup>b</sup>*Department of Chemistry, Tulane University, New Orleans, Louisiana, 70118, United States*

---

\* Author to whom correspondence should be addressed. E-mail: krishna@chem.iitb.ac.in,

msb\_krishna@iitb.ac.in (M. S. Balakrishna); Fax: +91-22-5172-3480/2576-7152.

## NMR spectra of compounds 3–9

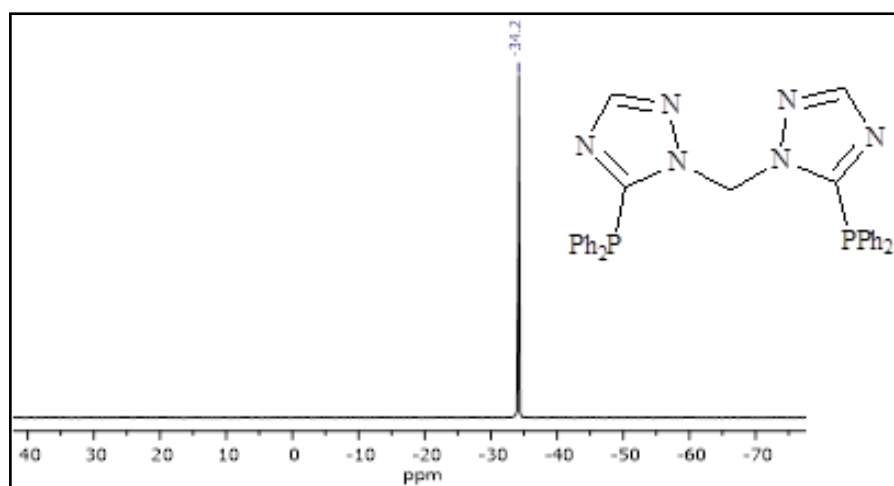

**Figure S1.**  $^{31}\text{P}\{^1\text{H}\}$  NMR spectrum of **3**

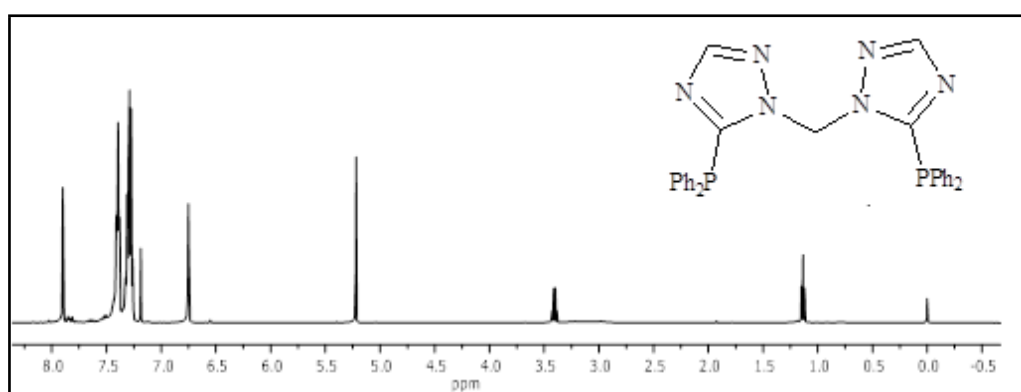

**Figure S2.**  $^1\text{H}$  NMR spectrum of **3**

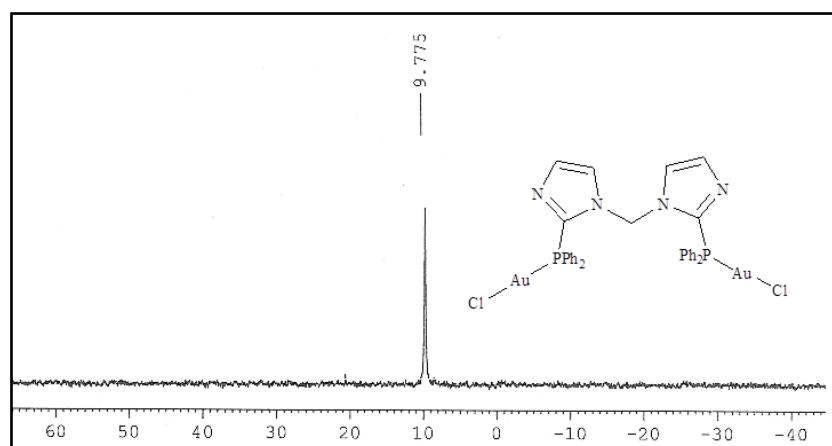

**Figure S3.**  $^{31}\text{P}\{^1\text{H}\}$  NMR spectrum of **4**

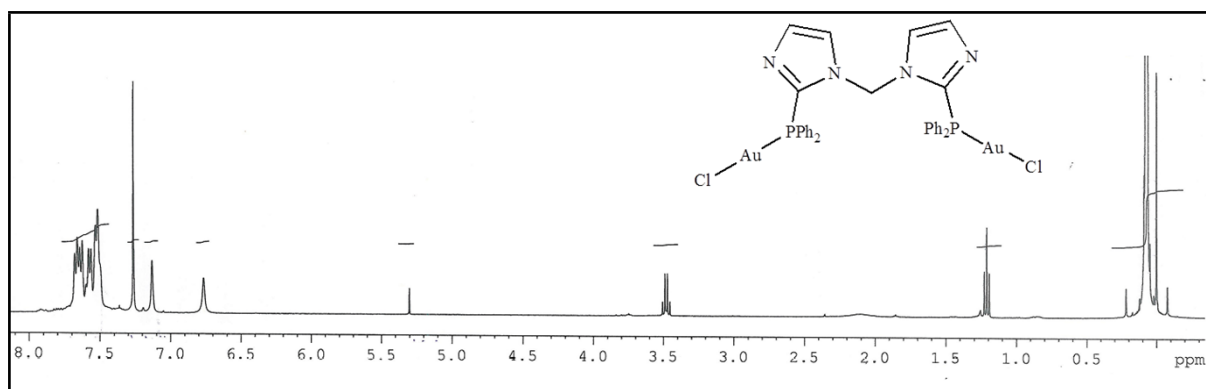

**Figure S4.**  $^1\text{H}$  NMR spectrum of **4**

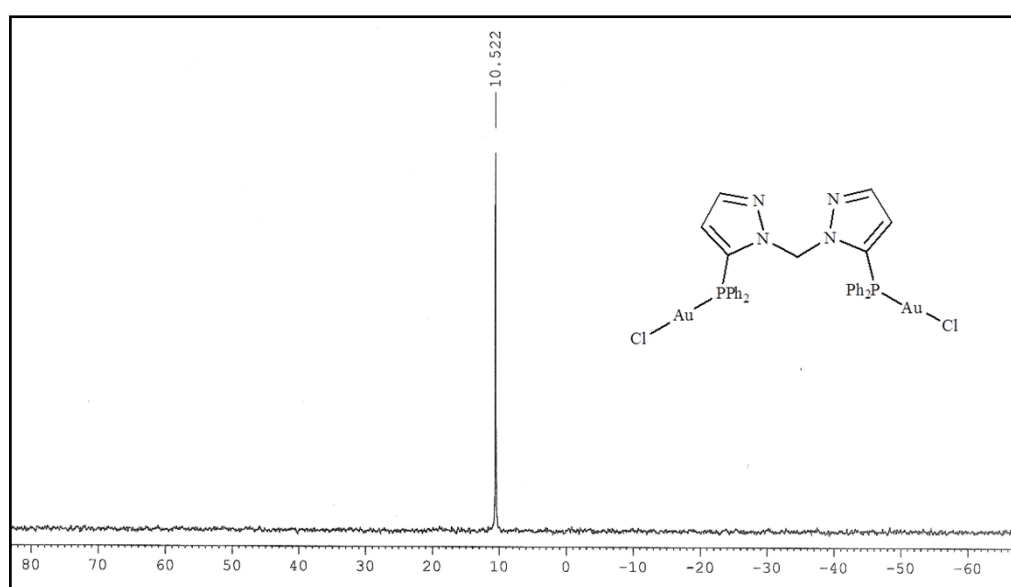

**Figure S5.**  $^{31}\text{P}\{^1\text{H}\}$  NMR spectrum of **5**

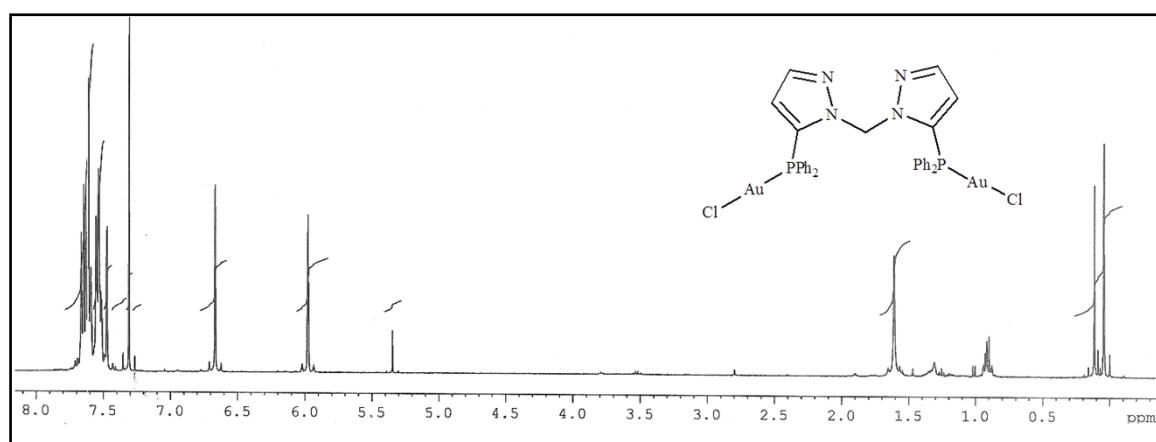

**Figure S6.**  $^1\text{H}$  NMR spectrum of **5**

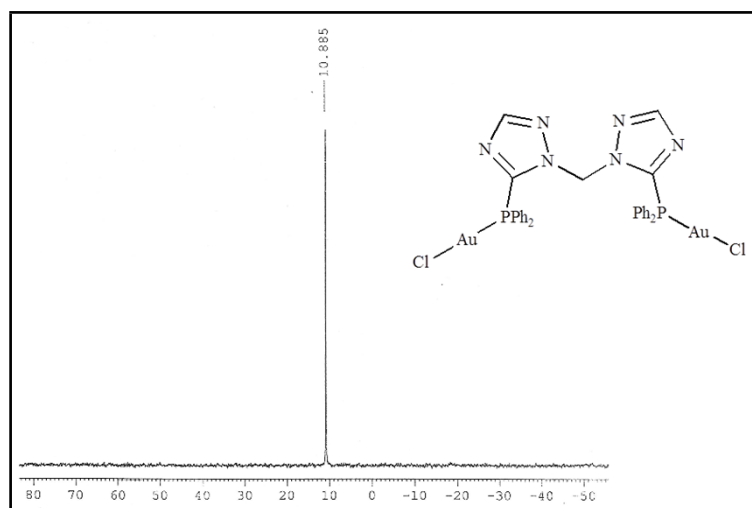

**Figure S7.**  $^{31}\text{P}\{^1\text{H}\}$  NMR spectrum of **6**

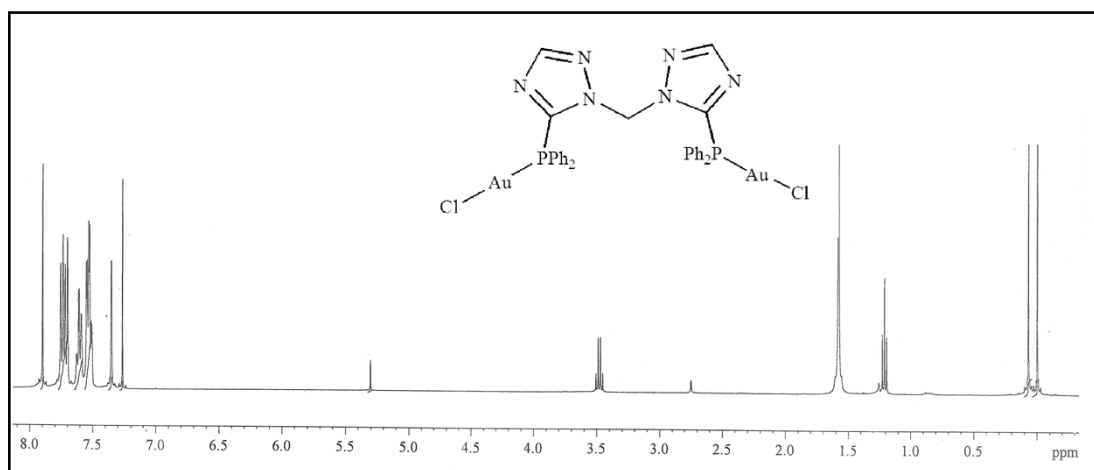

**Figure S8.**  $^1\text{H}$  NMR spectrum of **6**

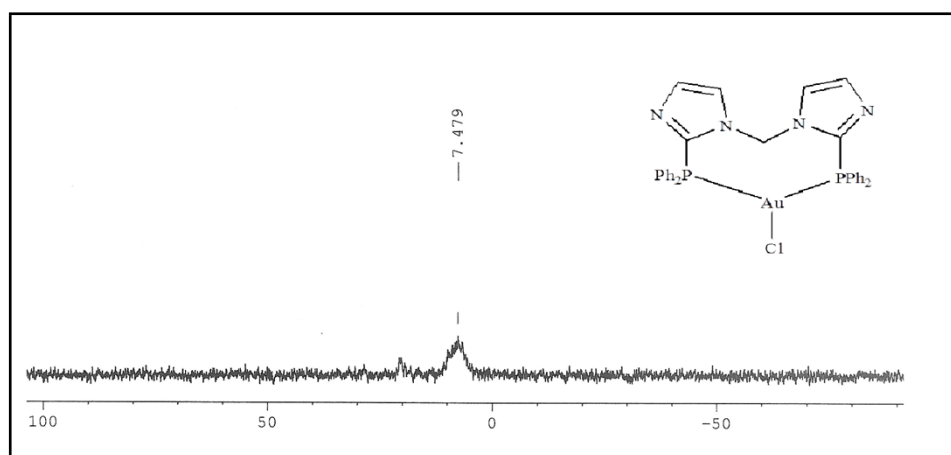

**Figure S9.**  $^{31}\text{P}\{^1\text{H}\}$  NMR spectrum of **7**

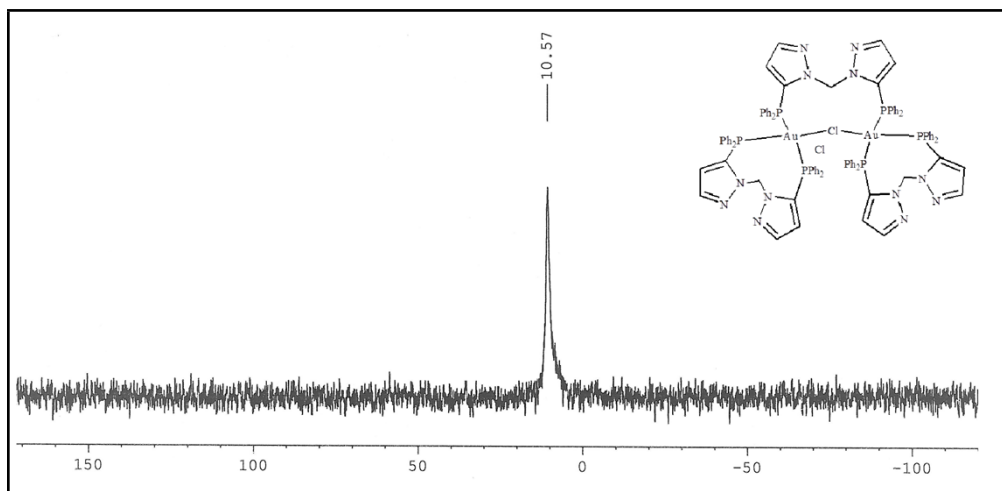

**Figure S10.**  $^{31}\text{P}\{^1\text{H}\}$  NMR spectrum of **8**

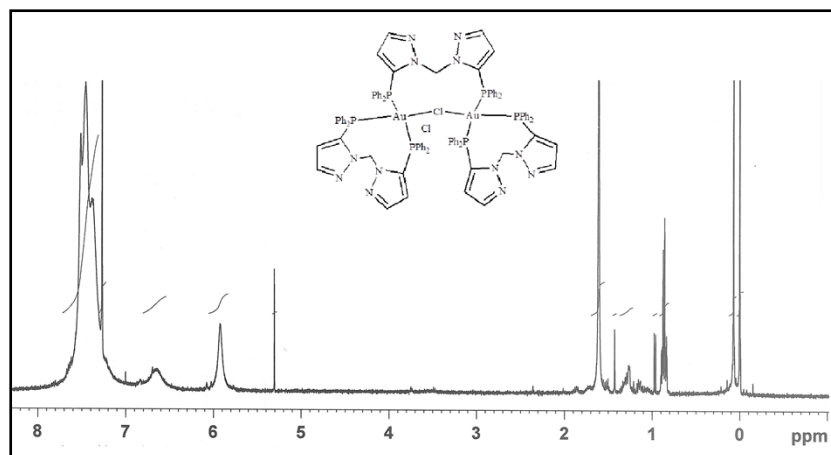

**Figure S11.**  $^1\text{H}$  NMR spectrum of **8**

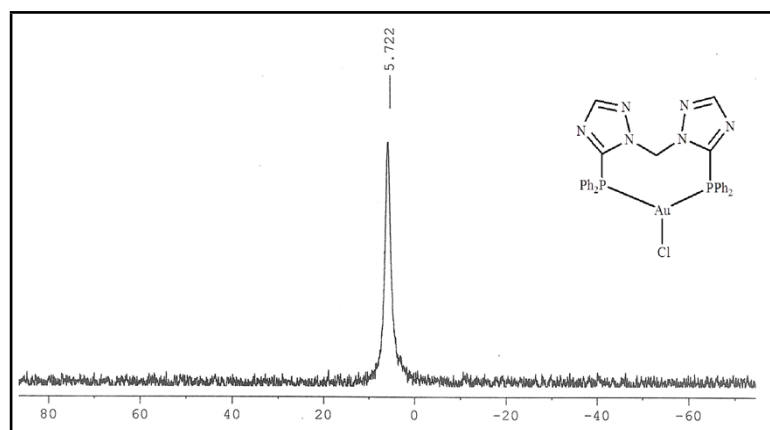

**Figure S12.**  $^{31}\text{P}\{^1\text{H}\}$  NMR spectrum of **9**

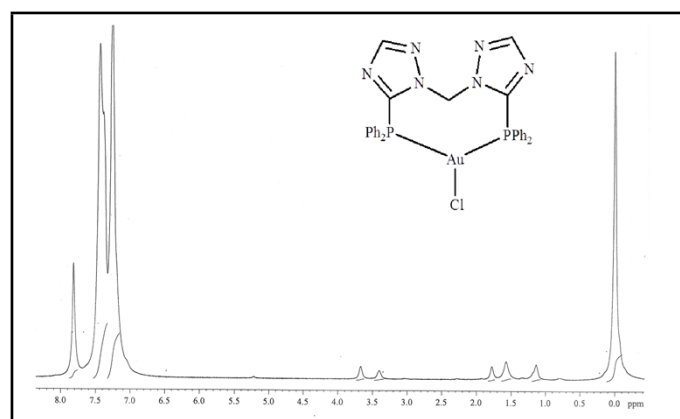

**Figure S12.**  $^1\text{H}$  NMR spectrum of **9**
